# Supplementary material for: Determination of thermal degradants in e-cigarette fluid via direct sample introduction (DSI) gas chromatography-tandem mass spectrometry
Source: Royal Society of Chemistry journal article supplement (doi:10.1039/c8ay01866a), 2018-01-01
Supplement: c8ay01866a1.pdf [file c8ay01866a1.pdf]

**Electronic Supplementary Material for:**

**Determination of Thermal Degradants in E-Cigarette Fluid  
via Direct Sample Introduction (DSI) Gas Chromatography-  
Tandem Mass Spectrometry**

Kevin J. Bisceglia, Sahar Caravan, Keegan Rogers, and Ling Huang\*

Department of Chemistry, Hofstra University, 151 Hofstra University, Hempstead, NY 11549,  
USA

\*Corresponding author; telephone: 01-516-463-7295, email: [ling.huang@hofstra.edu](mailto:ling.huang@hofstra.edu)

**Description:** The supplementary material contains validation characteristics for the determination of nicotine in EC fluids via DSI-GC-MS, GC-MS, and GC-FID (Table S1). It contains reported and calculated concentrations of nicotine in three EC fluids as determined with GC-FID, GC-MS, and DSI GC-MS (Table S2). It also includes EI mass spectra for e-cigarette (EC) fluid solvents and possible thermal degradation products (Figure S1), and a comparison of thermal breakdown product formation during autosampler and DSI injections for propylene glycol (Figure S2).

**Table S1.** Method validation characteristics for nicotine in EC fluids as determined via three different methods.

| <b>Parameter</b>                    | <b>DSI-GC-MS<sup>a</sup></b> | <b>AS-GC-MS<sup>a</sup></b> | <b>WN-GC-FID<sup>a</sup></b> |
|-------------------------------------|------------------------------|-----------------------------|------------------------------|
| LOD (mg/mL) <sup>b</sup>            | 0.23                         | 0.39                        | 0.14                         |
| LOQ (mg/mL) <sup>c</sup>            | 0.70                         | 1.18                        | 0.43                         |
| Accuracy (% of Target) <sup>d</sup> | 115                          | 135                         | 100                          |
| Precision (%RSD) <sup>d</sup>       | 13.0                         | 2.6                         | 2.4                          |
| Linearity (R <sup>2</sup> -value)   | 0.994                        | 0.985                       | 0.972                        |
| Range (mg/mL)                       | 0-20                         | 0-20                        | 0-20                         |

<sup>a</sup>DSI = direct sample introduction, AS = autosampler, WN = wet needle

<sup>b</sup>Limit of detection, computed according to USFDA guidelines<sup>1,2</sup> for method validation ( $LOD = 3.3\sigma/\text{slope}$ , where  $\sigma$  is the standard deviation of a 0.5 mg/mL standard)

<sup>c</sup>Limit of quantitation, computed according to USFDA guidelines<sup>1,2</sup> for method validation ( $LOQ = 10\sigma/\text{slope}$ , where  $\sigma$  is the standard deviation of a 0.5 mg/mL standard)

<sup>d</sup>Spiking concentration = 4 mg/mL (n = 3)

**Table S2.** Reported and calculated concentrations of nicotine in three EC fluids found with DSI-GC-MS, AS-GC-MS, and GC-FID (n=3)

| <i>EC Fluid</i>                  | <i>Reported<br/>(mg/mL)</i> | <i>DSI-GC-MS</i> | <i>AS-GC-MS</i> | <i>WN-GC-FID</i> |
|----------------------------------|-----------------------------|------------------|-----------------|------------------|
| <i>Lost Art Cottontail Cream</i> | 6.0                         | 5.6 ± 1.8        | 7.6 ± 0.58      | 5.5 ± 1.3        |
| <i>Vapor Chef Apple Bourbon</i>  | 6.0                         | 6.1 ± 1.3        | 7.0 ± 0.47      | 8.6 ± 1.6        |
| <i>Beard Vape Co. No. 51</i>     | 6.0                         | 7.6 ± 2.3        | 4.33 ± 0.20     | 6.31 ± 0.98      |
| <i>Deep Thought</i>              | 6.0                         | 7.28 ± 0.94      | ---             | ---              |
| <i>Iced Punch</i>                | 3.0                         | 3.78 ± 0.74      | ---             | ---              |
| <i>HYDRO</i>                     | 0.0                         | < LOQ            | ---             | ---              |

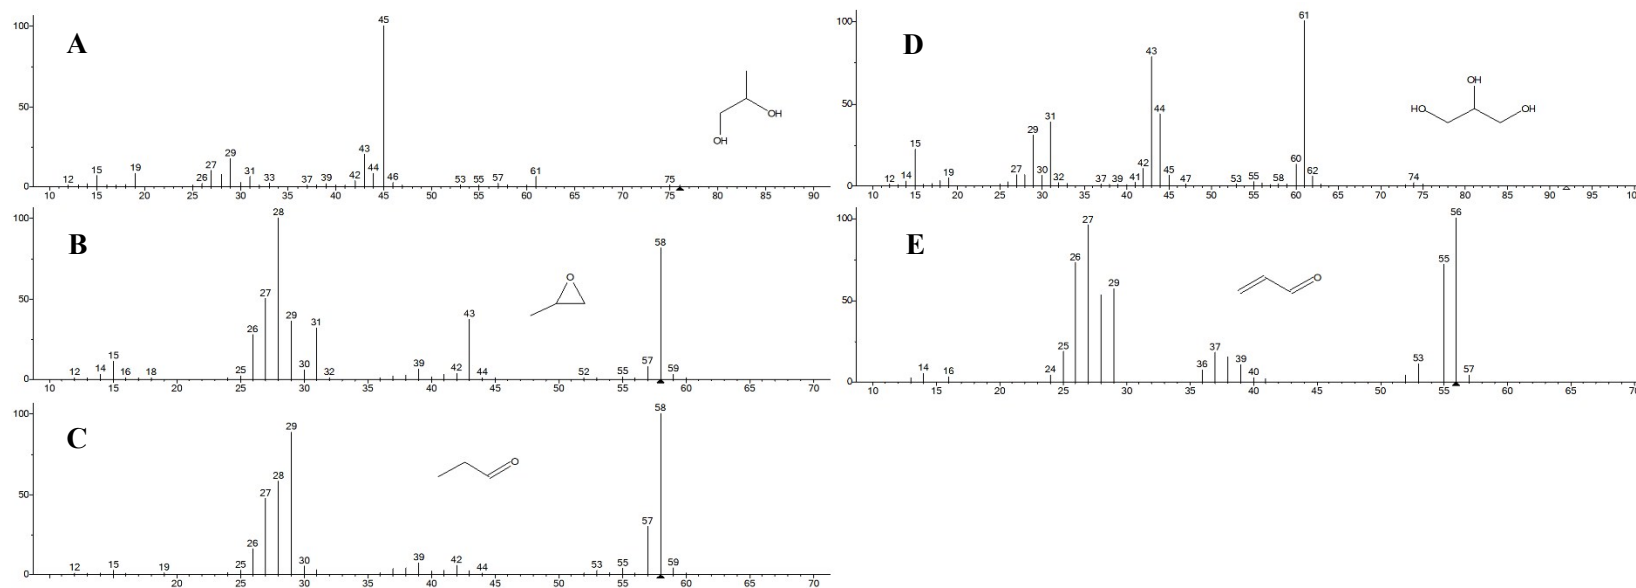

**Figure S1.** EI mass spectra<sup>3</sup> of EC carrier solvents and their proposed thermal breakdown products. (A.) Propylene Glycol (B.) Propylene Oxide (C.) Propanal (D.) Glycerol (E.) Acrolein

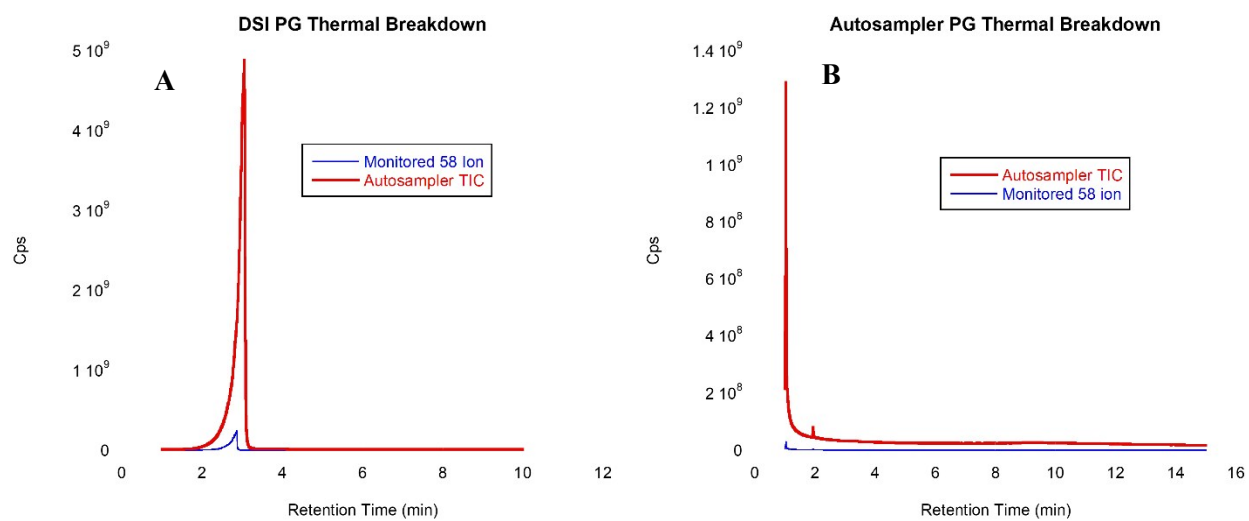

**Figure S2.** (A.) Comparison of PG elution against thermal breakdown product elution represented by a fragment at  $m/z$  58 via DSI (B.) Comparison of PG elution against thermal breakdown product elution represented by a fragment at  $m/z$  58 via Autosampler.

## References

1. Food and Drug Administration, *Analytical Procedures and Methods Validation for Drugs and Biologics. Guidance for Industry*, U.S. Department of Health and Human Services, 2015. <https://www.fda.gov/downloads/drugs/guidances/ucm386366.pdf>, (accessed October 2018).
2. *ICH Q2 (R1) Validation of Analytical Procedures: Text and Methodology*, International Conference on Harmonization of Technical Requirements for Pharmaceuticals for Human Use, 1994. [https://www.ich.org/fileadmin/Public\\_Web\\_Site/ICH\\_Products/Guidelines/Quality/Q2\\_R1/Step4/Q2\\_R1\\_\\_Guideline.pdf](https://www.ich.org/fileadmin/Public_Web_Site/ICH_Products/Guidelines/Quality/Q2_R1/Step4/Q2_R1__Guideline.pdf), (accessed October 2018).
3. NIST Chemistry WebBook. NIST Standard Reference Database Number 69, <https://webbook.nist.gov/chemistry/>. (accessed July 2018).
